# Supplementary material for: A fluorescent triazine-based covalent organic framework as a highly sensitive fluorescent probe for Fe3+ions
Source: Royal Society of Chemistry journal article supplement (doi:10.1039/d2nj05608a), 2022-12-12
Supplement: d2nj05608a1.pdf [file d2nj05608a1.pdf]

## Supporting Information

### A fluorescent triazine-based covalent organic frameworks as highly sensitive fluorescent probes for Fe<sup>3+</sup> ions

Guo Hao\*, Yinsheng Liu, Ning Wu, Liping Peng, Xiaoqin Wei,  
Zongyan Lu, Zhiguo Yu, Wu Yang\*

Key Lab of Eco-Environments Related Polymer Materials of MOE,

Key Lab of Bioelectrochemistry and Environmental Analysis of Gansu Province, College of Chemistry and Chemical Engineering, Northwest Normal University, Gansu International Scientific and Technological Cooperation Base of Water-Retention Chemical Functional Materials, Lanzhou 730070, P R China.

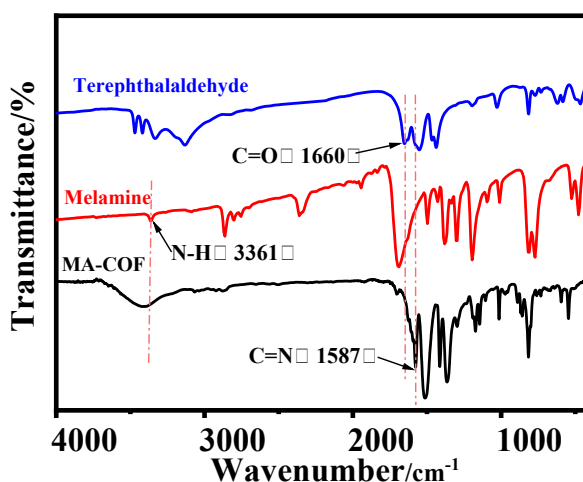

Figure S1. FT-IR spectra of MaTa-COF

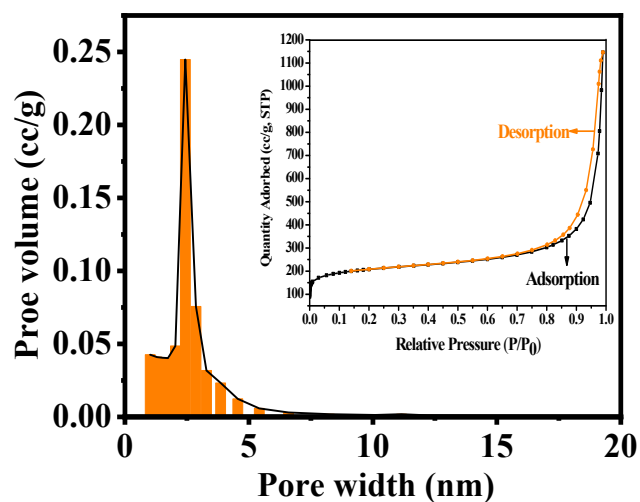

**Figure S2.** Pore size distribution of MaTa-COF. **Inset:** N<sub>2</sub> adsorption and desorption isotherm for MaTa-COF measured at 77 K.

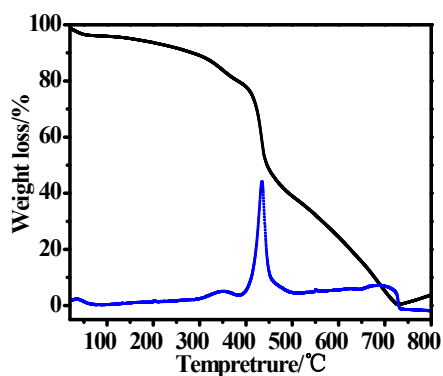

**Figure S3.** Thermogravimetric curves of MaTa-COF nanoparticles

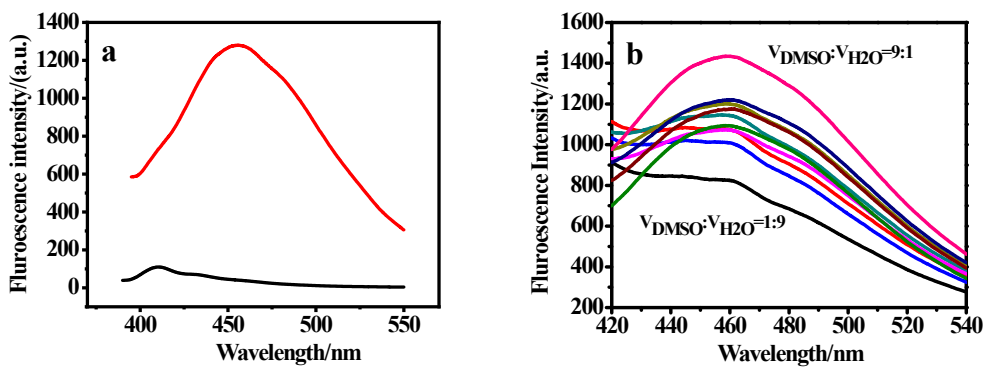

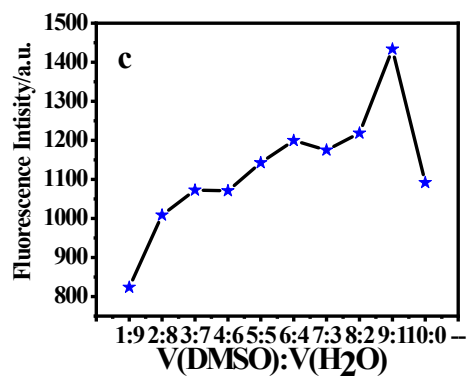

**Figure S4.** (a) Fluorescence spectra of DMSO (black curve) and MaTa-COF in DMSO (red curve); (b) Fluorescent spectra of MaTa-COF in the mixture solvents with different ratio (DMSO: H<sub>2</sub>O(V/V) = 0:10, 1:9, 2:8, 3:7, 4:6, 5:5, 6:4, 7:3, 8:2, 9:1, 10:0 ); (c) Fluorescence intensities under different DMSO/H<sub>2</sub>O volume ratios.

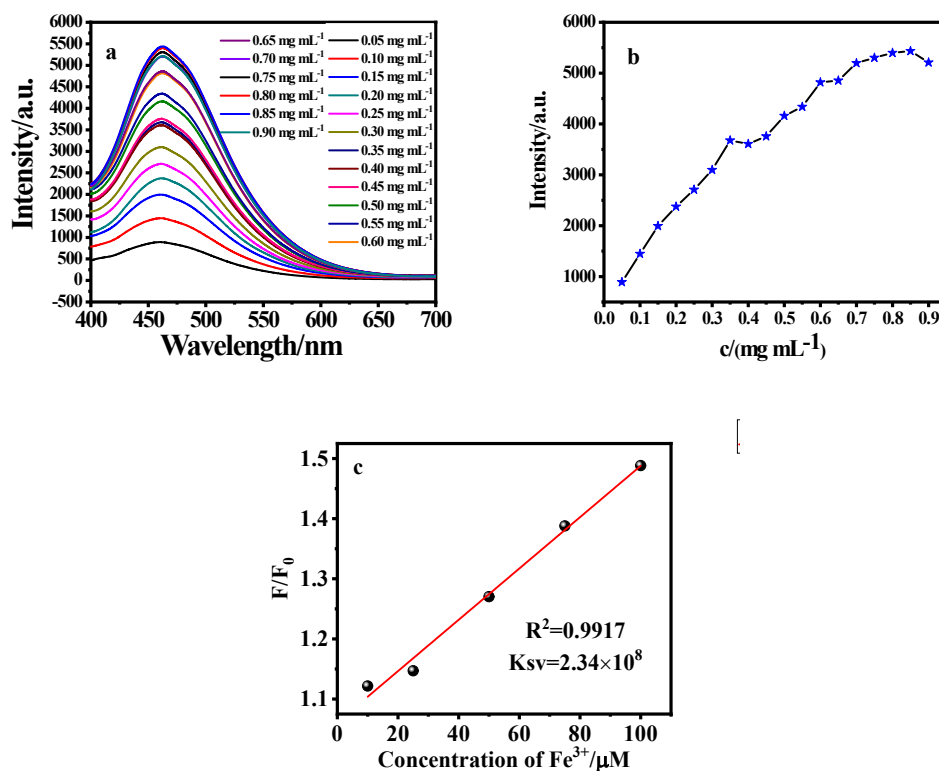

**Figure S5.** (a) Fluorescent spectra of MaTa-COF of different concentrations; (b) Fluorescence intensity change with the COF concentration; (c) Stern-Volmer plot.

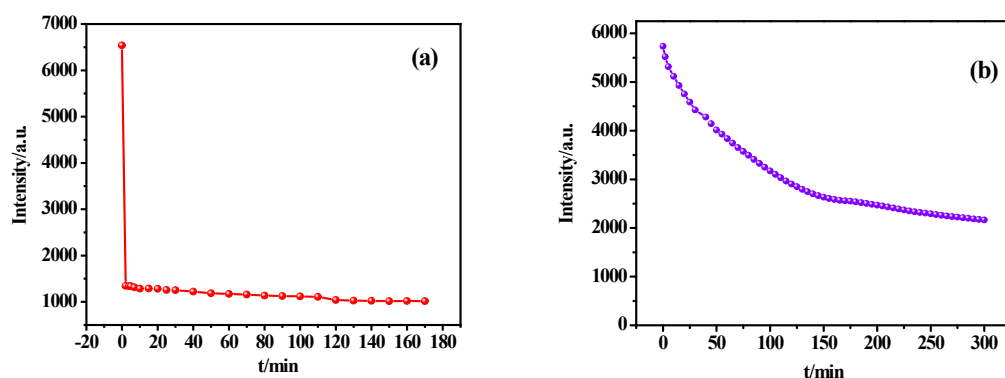

Figure S6. Time-dependent fluorescence quenching by  $\text{Fe}^{3+}$ (a) and  $\text{Ag}^+$ (b).

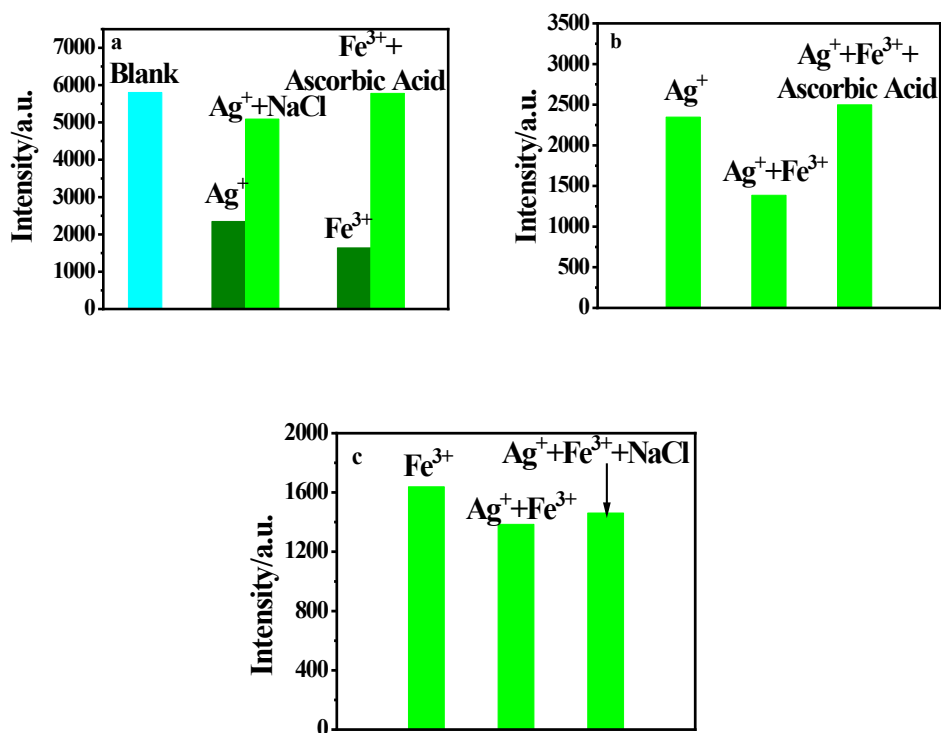

Figure S7. Recovery of fluorescence intensity of MaTa-COF suspension.

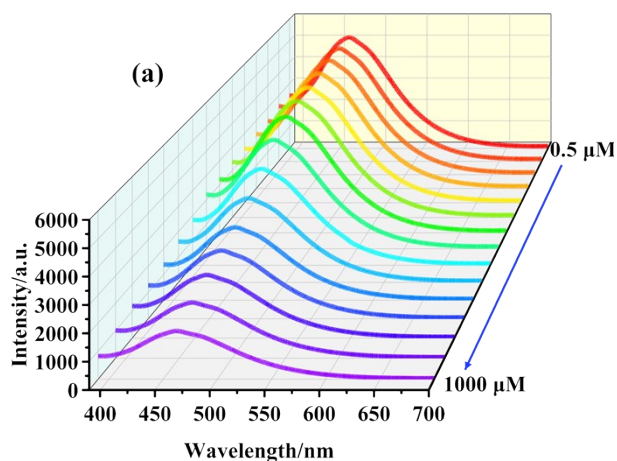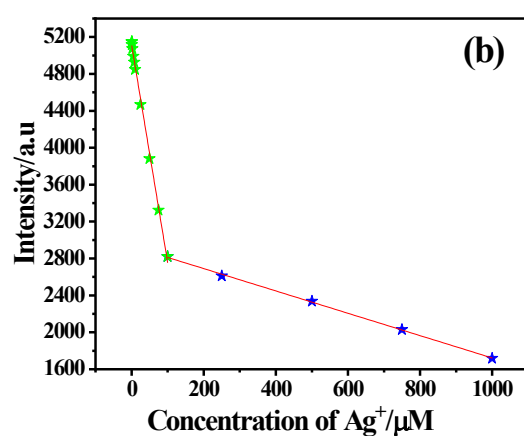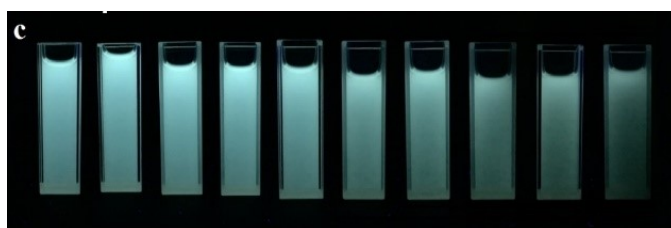

**Figure S8.** (a) Fluorescence spectra of MaTa-COF in the presence of different concentrations of  $\text{Ag}^+$ ; (b) The linear relationship between the fluorescence intensity and the  $\text{Ag}^+$  concentration ( $I = 2932.8904 - 1.2106C_{\text{Ag}^+}$  ( $R^2 = 0.9990$ ) in the range of 100 to 1000  $\mu\text{M}$ , and  $I = 5117.589 - 23.6021C_{\text{Ag}^+}$  ( $R^2 = 0.9971$ ) in the range of 0.50 to 100  $\mu\text{M}$ ), LOD = 1.41  $\mu\text{M}$ (S/N = 3); (c) Optical images of the COF suspension with different concentrations of  $\text{Ag}^+$

**Table S1** Comparison of the Fe<sup>3+</sup> detection properties of MaTa-COF with other fluorescence sensors reported in previous literatures.

| <b>Methods</b> | <b>Materials</b>          | <b>Linear range<br/>(<math>\mu\text{M}</math>)</b> | <b>Detection<br/>Limits (<math>\mu\text{M}</math>)</b> | <b>Reference<br/>s</b> |
|----------------|---------------------------|----------------------------------------------------|--------------------------------------------------------|------------------------|
| Fluorescence   | DNSE                      | 0-100                                              | 3.45                                                   | [S1]                   |
| Fluorescence   | Bth-Dma COF               | 0-100                                              | 0.17                                                   | [S2]                   |
| Fluorescence   | NFCDs                     | 0.2-150                                            | 0.14                                                   | [S3]                   |
| Fluorescence   | Eu <sup>3+</sup> @MIL-124 | 0-500                                              | 0.28                                                   | [S4]                   |
| Fluorescence   | PI-COF 201                | 5.0–400                                            | 0.13                                                   | [S5]                   |
|                | PI-COF 202                | 5.0-300                                            | 0.22                                                   | [S5]                   |
| Fluorescence   | MaTa-COF                  | 0-250                                              | 0.0618                                                 | This work              |

## References

- [S1] C. M. Sha, S. Z. Lu, F Lv and D.M. Xu, Res. Chem. Intermed., 2016, **42**,5825–5834
- [S2] G. Chen, H. H. Lan, S. L. Cai, B. Sun, X. L. Li, Z. H. He, S. R. Zheng, J. Fan, Y. Liu and W. G. Zhang, ACS Appl. Mater. Interfaces, 2019,**11**,12830–1283
- [S3] S. Ye, M. M. Zhang, J. Q. Guo, X. T. Yu, J. Song, P. G. Zeng, J. L. Qu, Y. Chen and H. Li, Molecules, 2022,**27**,6158
- [S4] X. Y. Xu and B. Yan, ACS Appl. Mater. Interfaces, 2015,7,721–729
- [S5] T. Wang, R. Xue, H.Q. Chen, P.L. Shi, X. Lei, Y.L. Wei, H. Guo and W. Yang, New J. Chem., 2017,41, 14272
